# Supplementary material for: Accurate diagnosis of pulmonary nodules using a noninvasive DNA methylation test
Source: JCI journal article supplement (doi:10.1172/jci145973), 2021-04-01
Supplement: sd3 [file 3]

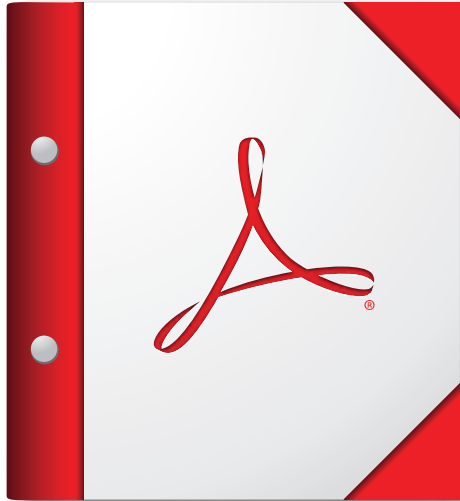

**For the best experience, open this PDF portfolio in  
Acrobat X or Adobe Reader X, or later.**

[Get Adobe Reader Now!](#)
